# Supplementary material
Source: Springer Nature journal article supplement (https://www.springermedizin.de/resource/supplementary/12889_2008_1491_MOESM6_ESM.pdf/9504408)
Supplement: MOESM6 [file 9504408]

### Overweight

### Obese

0.5 1 2 4 16

0.5 1 2 4 16 32

| Study                   | Obesity | Sex | Age   | F-up | Country   | N      | Outcome                        | Risk Est (95% CI)  | Risk Est (95% CI)  |
|-------------------------|---------|-----|-------|------|-----------|--------|--------------------------------|--------------------|--------------------|
| MacInnis (2004) [54]    | WC      | M   | 40-69 | 8.8  | Australia | 16556  | IRR                            | 2.17 (1.43 - 3.30) | 3.03 (2.05 - 4.48) |
| Giovannucci (1995) [55] | WC      | M   | 40-75 | 5.5  | US        | 31055  | IRR                            | 1.81 (1.07 - 3.06) | 3.38 (2.20 - 5.19) |
| Moore (2004) [56]       | WC      | M   | 30-79 | 30.4 | US        | 3345   | IRR                            | 1.71 (1.17 - 2.50) | 2.45 (1.59 - 3.76) |
| Moore (2004) [56]       | WC      | M   | 30-79 | 30.4 | US        | 3345   | RR-P                           | 1.58 (1.09 - 2.28) | 2.11 (1.39 - 3.20) |
| Pischon (2006) [57]     | WC      | M   | 25-70 | 6.3  | European  | 129731 | RR-P                           | 1.37 (1.14 - 1.65) | 1.72 (1.45 - 2.05) |
|                         |         |     |       |      |           |        | IRR: All studies (3)           | 1.88 (1.47 - 2.41) | 2.93 (2.31 - 3.73) |
|                         |         |     |       |      |           |        | IRR: F-up<10 yrs (2)           | 2.02 (1.46 - 2.80) | 3.18 (2.38 - 4.25) |
|                         |         |     |       |      |           |        | IRR & RR-P: F-up<10 yrs (3)    | 1.73 (1.33 - 2.26) | 2.49 (1.74 - 3.57) |
|                         |         |     |       |      |           |        | IRR: US studies (2)            | 1.74 (1.28 - 2.37) | 2.87 (2.12 - 3.89) |
|                         |         |     |       |      |           |        | IRR & RR-P: US studies (2)     | 1.74 (1.28 - 2.37) | 2.87 (2.12 - 3.89) |
|                         |         |     |       |      |           |        | IRR & RR-P: Europe studies (1) | 1.37 (1.14 - 1.65) | 1.72 (1.45 - 2.05) |
| Rapp (2005) [45]        | BMI     | M   | 35-54 | 9.6  | Austria   | 67447  | IRR                            | 1.89 (1.52 - 2.36) | 3.08 (2.31 - 4.12) |
| Moore (2004) [56]       | BMI     | M   | 30-79 | 30.4 | US        | 3345   | IRR                            | 1.61 (1.09 - 2.38) | 2.38 (1.44 - 3.93) |
| Giovannucci (1995) [55] | BMI     | M   | 40-75 | 5.5  | US        | 47723  | IRR                            | 1.60 (1.18 - 2.16) | 1.88 (1.24 - 2.84) |
| Ford (1999) [58]        | BMI     | M   | 25-74 | 16.6 | US        | 5506   | IRR                            | 1.48 (0.98 - 2.24) | 1.28 (0.71 - 2.33) |
| MacInnis (2004) [54]    | BMI     | M   | 40-69 | 8.8  | Australia | 16556  | IRR                            | 1.43 (0.92 - 2.23) | 1.90 (1.18 - 3.04) |
| Engeland (2005) [59]    | BMI     | M   | 20-74 | 23.7 | Norway    | 962901 | IRR                            | 1.40 (1.37 - 1.44) | 1.67 (1.59 - 1.76) |
| Lukanova (2005) [42]    | BMI     | M   | 30-61 | 8.2  | Sweden    | 33424  | IRR                            | 1.16 (0.80 - 1.69) | 1.65 (0.99 - 2.75) |
| Rapp (2005) [45]        | BMI     | M   | 35-54 | 9.6  | Austria   | 67447  | RR-P                           | 1.90 (1.52 - 2.36) | 2.84 (2.13 - 3.80) |
| Giovannucci (1995) [55] | BMI     | M   | 40-75 | 5.5  | US        | 47723  | RR-P                           | 1.59 (1.18 - 2.16) | 1.87 (1.24 - 2.82) |
| Moore (2004) [56]       | BMI     | M   | 30-79 | 30.4 | US        | 3345   | RR-P                           | 1.51 (1.03 - 2.22) | 2.04 (1.25 - 3.33) |
| Lukanova (2005) [42]    | BMI     | M   | 30-61 | 8.2  | Sweden    | 33424  | RR-P                           | 1.43 (0.99 - 2.09) | 1.91 (1.15 - 3.18) |
| Pischon (2006) [57]     | BMI     | M   | 25-70 | 6.3  | European  | 129731 | RR-P                           | 1.14 (0.97 - 1.35) | 1.38 (1.14 - 1.67) |
|                         |         |     |       |      |           |        | IRR: All studies (7)           | 1.51 (1.37 - 1.67) | 1.95 (1.59 - 2.39) |
|                         |         |     |       |      |           |        | RR-P: All studies (5)          | 1.48 (1.23 - 1.79) | 1.95 (1.51 - 2.51) |
|                         |         |     |       |      |           |        | IRR: F-up<10 yrs (4)           | 1.54 (1.25 - 1.89) | 2.13 (1.59 - 2.86) |
|                         |         |     |       |      |           |        | IRR: F-up>=10 yrs (3)          | 1.41 (1.37 - 1.44) | 1.68 (1.59 - 1.77) |
|                         |         |     |       |      |           |        | RR-P: F-up<10 yrs (4)          | 1.48 (1.19 - 1.83) | 1.93 (1.44 - 2.60) |
|                         |         |     |       |      |           |        | RR-P: F-up>=10 yrs (1)         | 1.51 (1.03 - 2.22) | 2.04 (1.25 - 3.33) |
|                         |         |     |       |      |           |        | IRR: max.age<65 (2)            | 1.52 (1.06 - 2.18) | 2.34 (1.47 - 3.72) |
|                         |         |     |       |      |           |        | IRR: max.age>=65 (5)           | 1.41 (1.37 - 1.44) | 1.68 (1.60 - 1.77) |
|                         |         |     |       |      |           |        | RR-P: max.age<65 (2)           | 1.76 (1.46 - 2.13) | 2.58 (2.01 - 3.32) |
|                         |         |     |       |      |           |        | RR-P: max.age>=65 (3)          | 1.36 (1.10 - 1.67) | 1.65 (1.30 - 2.09) |
|                         |         |     |       |      |           |        | IRR & RR-P: max.age<65 (2)     | 1.52 (1.06 - 2.18) | 2.34 (1.47 - 3.72) |
|                         |         |     |       |      |           |        | IRR & RR-P: max.age>=65 (6)    | 1.40 (1.36 - 1.44) | 1.66 (1.58 - 1.74) |
|                         |         |     |       |      |           |        | IRR: US studies (3)            | 1.57 (1.27 - 1.93) | 1.86 (1.40 - 2.46) |
|                         |         |     |       |      |           |        | IRR: Europe studies (3)        | 1.53 (1.29 - 1.81) | 2.00 (1.40 - 2.87) |
|                         |         |     |       |      |           |        | RR-P: US studies (2)           | 1.56 (1.23 - 1.98) | 1.94 (1.41 - 2.65) |
|                         |         |     |       |      |           |        | RR-P: Europe studies (3)       | 1.45 (1.11 - 1.90) | 1.94 (1.33 - 2.83) |
|                         |         |     |       |      |           |        | IRR & RR-P: US studies (3)     | 1.57 (1.27 - 1.93) | 1.86 (1.40 - 2.46) |
|                         |         |     |       |      |           |        | IRR & RR-P: Europe studies (4) | 1.44 (1.20 - 1.74) | 1.77 (1.30 - 2.40) |

0.5 1 2 4 16

0.5 1 2 4 16 32

RR

RR
